# Supplementary material
Source: PubMed Central journal article supplement (PMC4277571)
Supplement: AEM.02579-14_zam999105944so1.pdf [file AEM.02579-14_zam999105944so1.pdf]

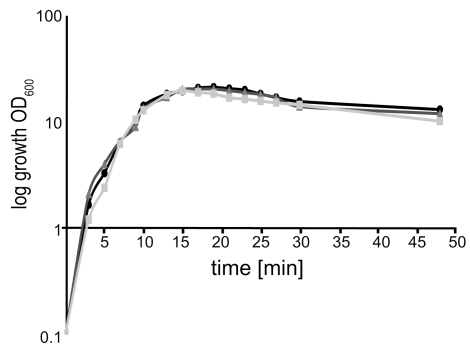

**Figure S1:** Growth of entianin producing strain B15029, cultivated either in Landy medium with 2 % glucose (black), Landy medium with 6 % glucose (LGLU6, dark grey) or Landy medium with 10 % glucose (LGLU10, light grey).
